# Supplementary material
Source: PubMed Central journal article supplement (PMC2990342)
Supplement: NIHMS139089-supplement-supplement.pdf [file NIHMS139089-supplement-supplement.pdf]

**Hierarchical cognitive control deficits following damage to the human frontal lobe**

David Badre<sup>1,2</sup>, Joshua Hoffman<sup>3</sup>, Jeffrey W. Cooney<sup>3</sup>, & Mark D’Esposito<sup>3,4</sup>

<sup>1</sup>Department of Cognitive & Linguistic Sciences, Brown University

<sup>2</sup>Department of Psychology, Brown University

<sup>3</sup>Helen Wills Neuroscience Institute, University of California, Berkeley

<sup>4</sup>Department of Psychology, University of California, Berkeley

SUPPLEMENTARY MATERIALS

**Supplementary Figure 1.** Error rates for patients and controls across competition conditions of the four tasks. (\*  $p < .05$ ; ~  $p = .06$ ; error based are s.e.m.)

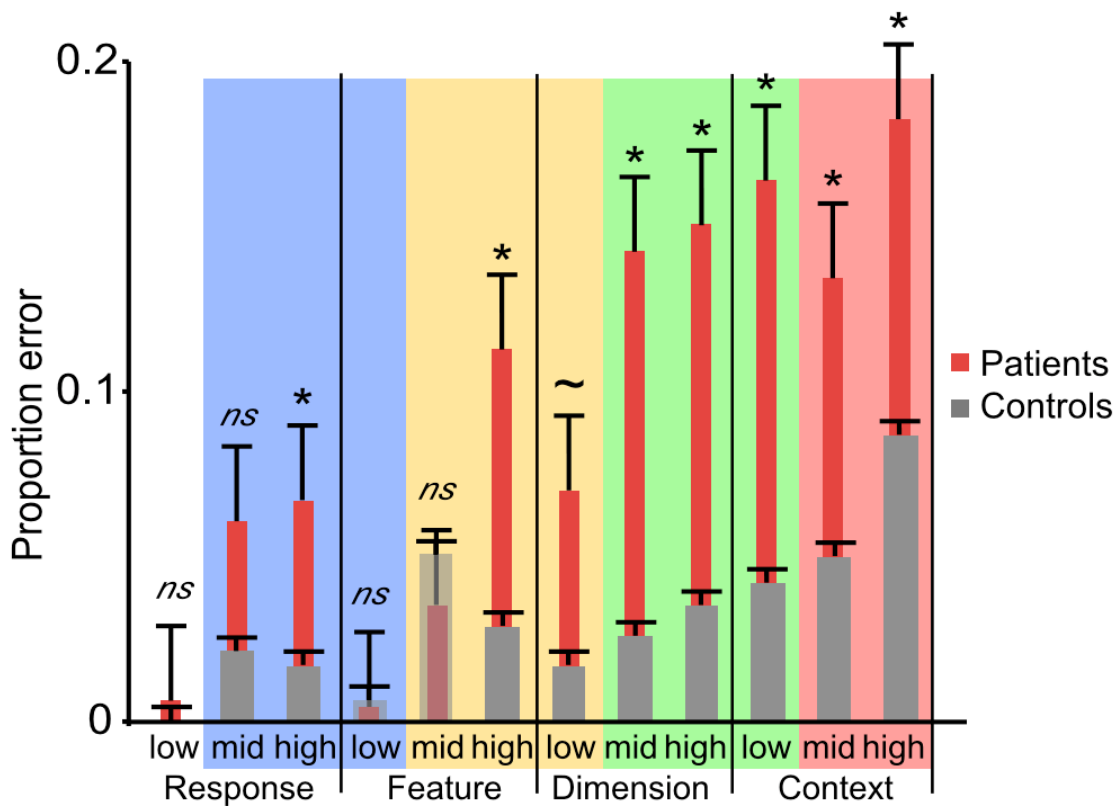

## Supplementary Table 1

Effects of deficit criterion (standard deviations [SD]) on  $p(D)$ ,  $p(D|L)$ , and  $p(D|H)$ 

| <b>Deficit<br/>criterion (SD)</b> | <b><math>p(D)</math></b> | <b><math>p(D L)</math></b> | <b>Bayes Factor<br/><math>p(D L)_{\text{odds}}/p(D)_{\text{odds}}</math></b> | <b><math>p(D H)</math></b> | <b>Bayes Factor<br/><math>p(D H)_{\text{odds}}/p(D)_{\text{odds}}</math></b> |
|-----------------------------------|--------------------------|----------------------------|------------------------------------------------------------------------------|----------------------------|------------------------------------------------------------------------------|
| 1.0                               | 0.74                     | 1.00                       | >100                                                                         | 0.71                       | 0.86                                                                         |
| 1.5                               | 0.72                     | 0.98                       | 15.10                                                                        | 0.74                       | 1.08                                                                         |
| 2.0*                              | 0.63                     | 0.92                       | 6.72                                                                         | 0.77                       | 2.02                                                                         |
| 2.5                               | 0.54                     | 0.90                       | 7.54                                                                         | 0.65                       | 1.62                                                                         |

\* Criterion used for reported results.
